# Supplementary material
Source: PubMed Central journal article supplement (PMC4406801)
Supplement: NIHMS652966-supplement-2.pdf [file NIHMS652966-supplement-2.pdf]

# SUPPLEMENTAL MATERIAL

**Supplementary Figure 1.** Untransformed and transformed HGF concentrations (pg/mL) in the Framingham Heart Study (FHS).

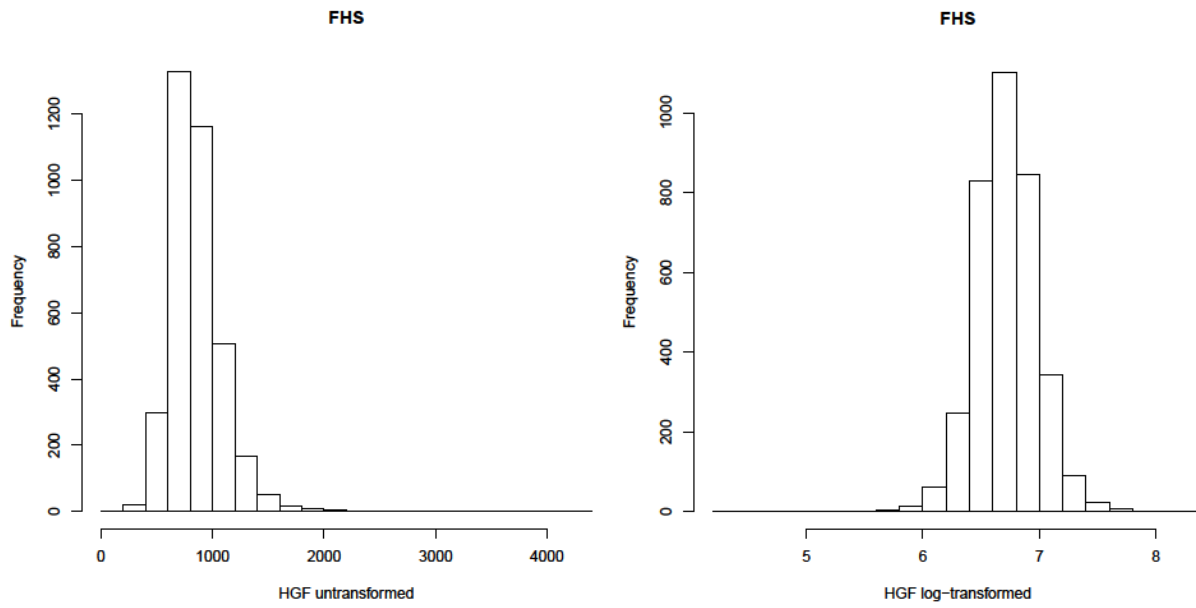

**Supplementary Figure 2.** Untransformed and transformed Ang-2 concentrations (ng/mL) in the Framingham Heart Study (FHS) sample (**Panel A**) and in the SHIP (Study of Health in Pomerania) sample (**Panel B**).

**Panel A**

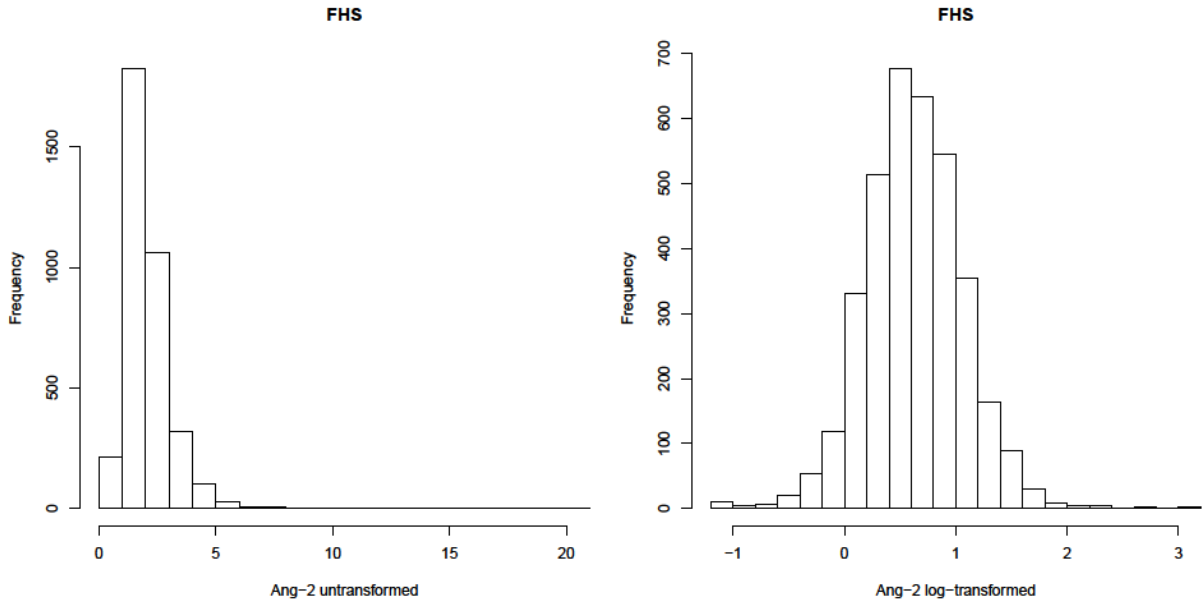

**Panel B**

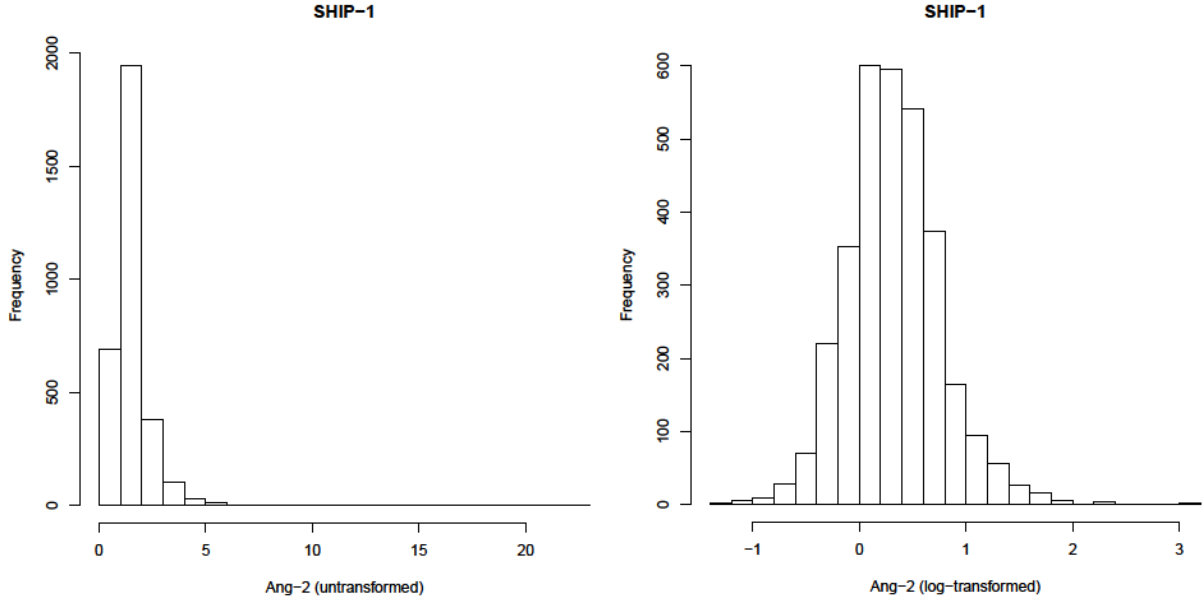

**Supplementary Figure 3.** Untransformed and transformed sTie-2 concentrations (ng/mL) in the Framingham Heart Study (FHS) sample (**Panel A**) and in the SHIP (Study of Health in Pomerania) sample (**Panel B**).

**Panel A**

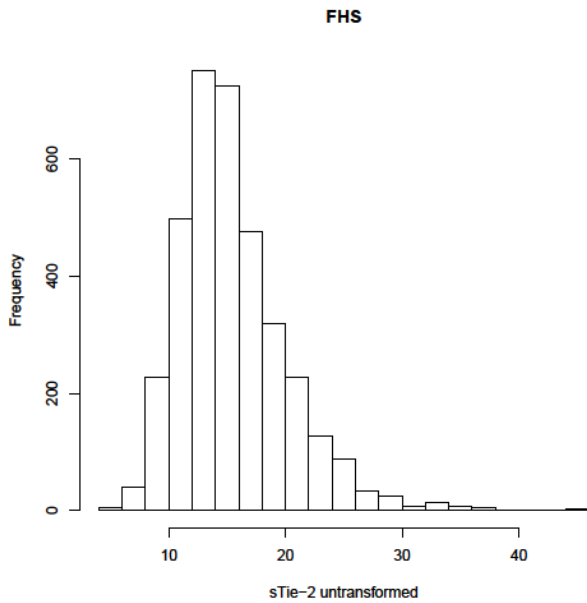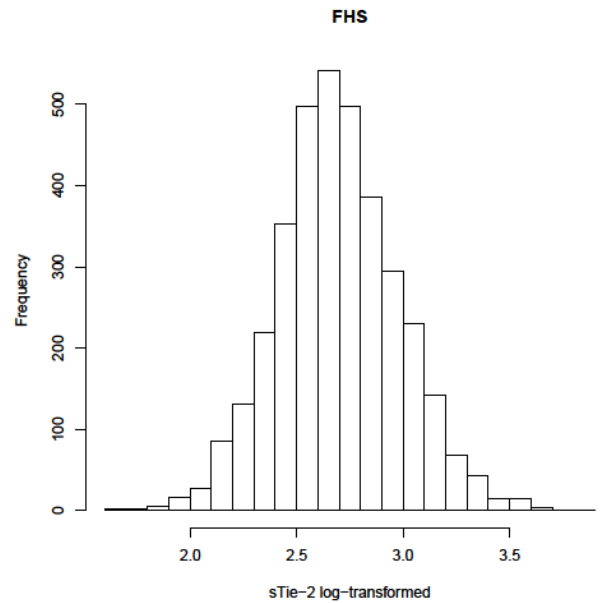

**Panel B**

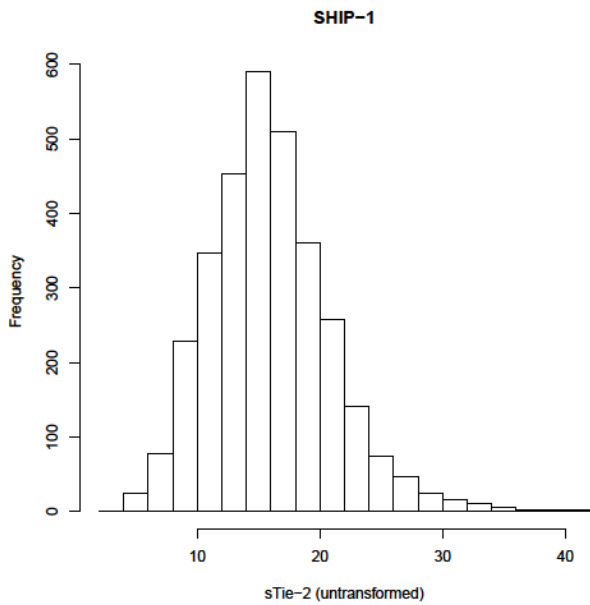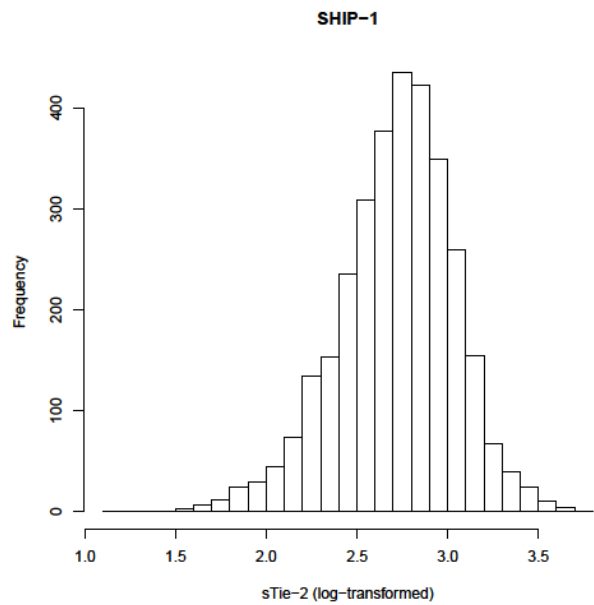

**Supplementary Figure 4.** Quantile-quantile plots comparing the observed against the expected  $-\log_{10}$  (p-value) distributions associating common genetic variants to circulating levels of hepatocyte growth factor (**HGF**), angiotensin-2 (**Ang-2**), and Tie-2 (**sTie-2**), respectively, in the Framingham Heart Study.

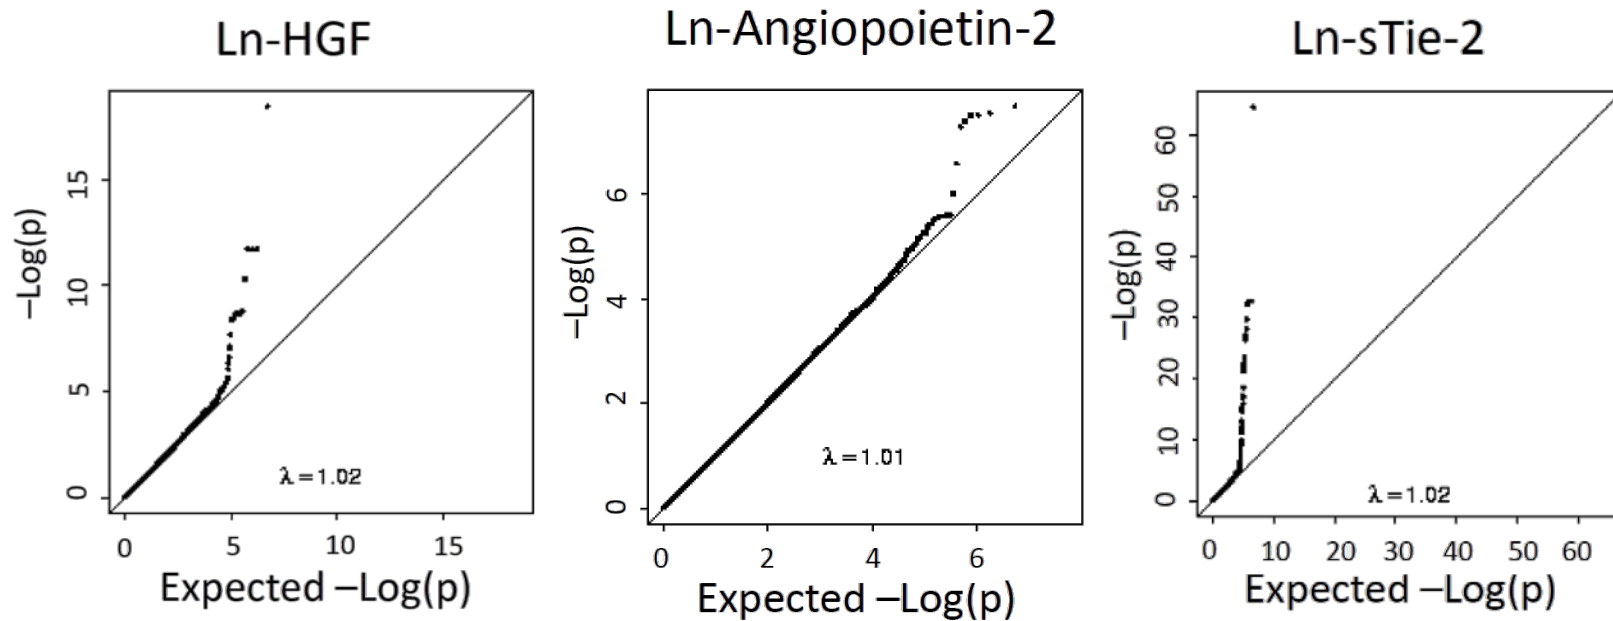

Ln, biomarkers were logarithmically transformed (to the base e) prior to genetic analyses

**Supplementary Figure 5.** Circulating concentrations of hepatocyte growth factor (HGF), stratified by rs5745687 genotype in the Framingham Heart Study (FHS) sample.

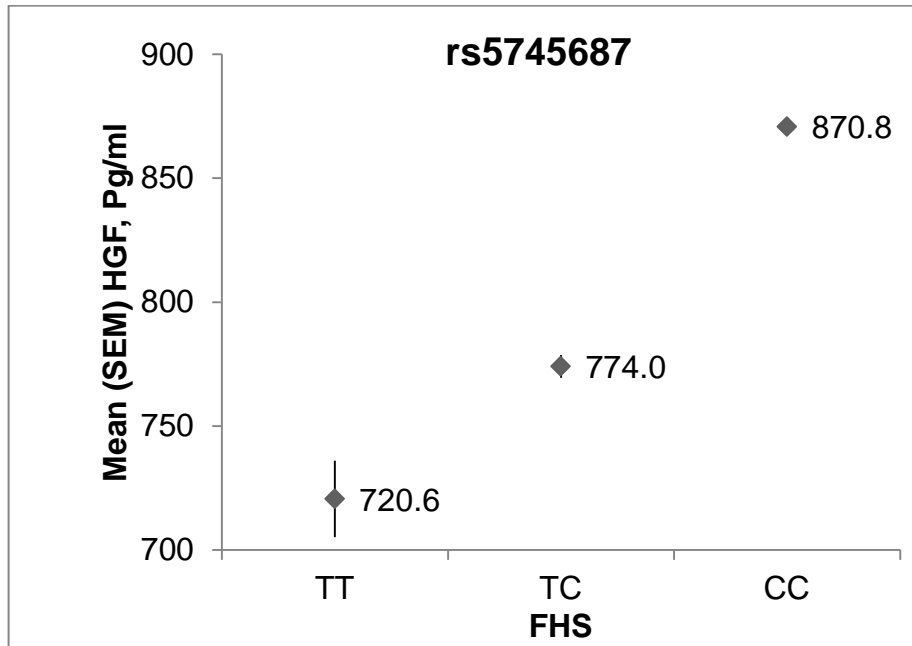

**Supplementary Figure 6.** Angiotensin-2 (Ang-2) concentrations stratified by rs2442517 genotypes (**Panel A**) and stratified by rs8176746 genotypes (**Panel B**) in the Framingham Heart Study (FHS) sample and in the SHIP (Study of Health in Pomerania) sample.

**Panel A**

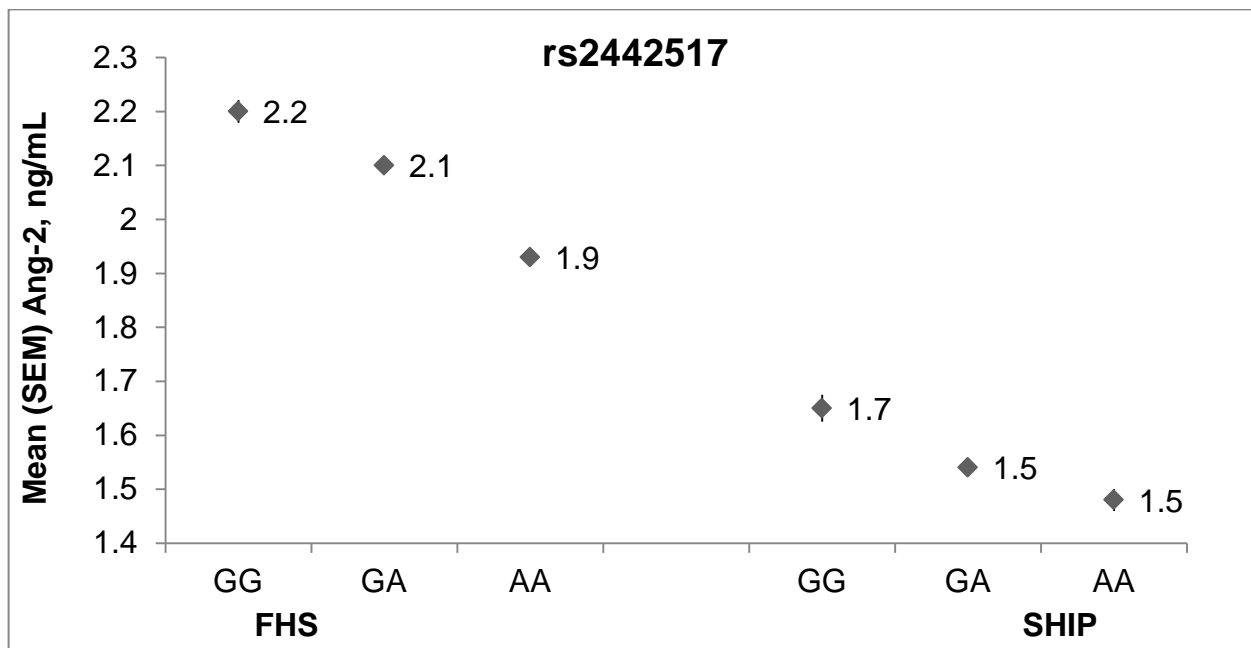

**Panel B**

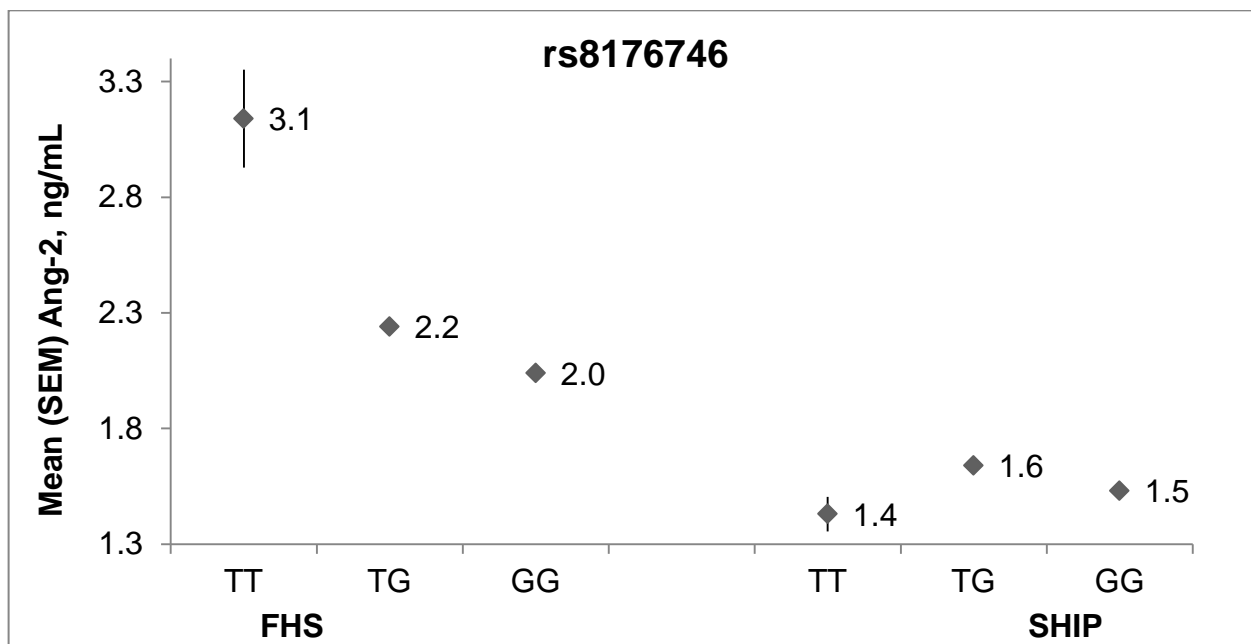

**Supplementary Figure 7.** Tie-2 concentrations stratified by rs2273720 genotypes (**Panel A**) and stratified by rs8176693 genotypes (**Panel B**) in the Framingham Heart Study (FHS) sample and in the SHIP (Study of Health in Pomerania) sample.

**Panel A**

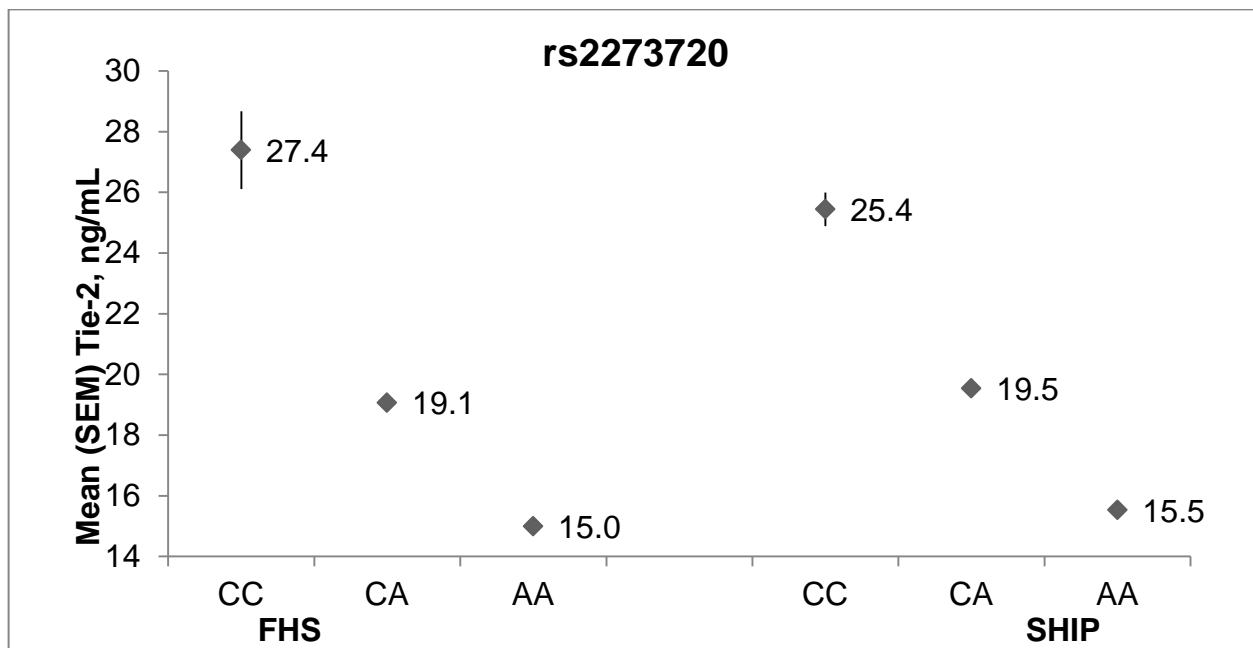

**Panel B**

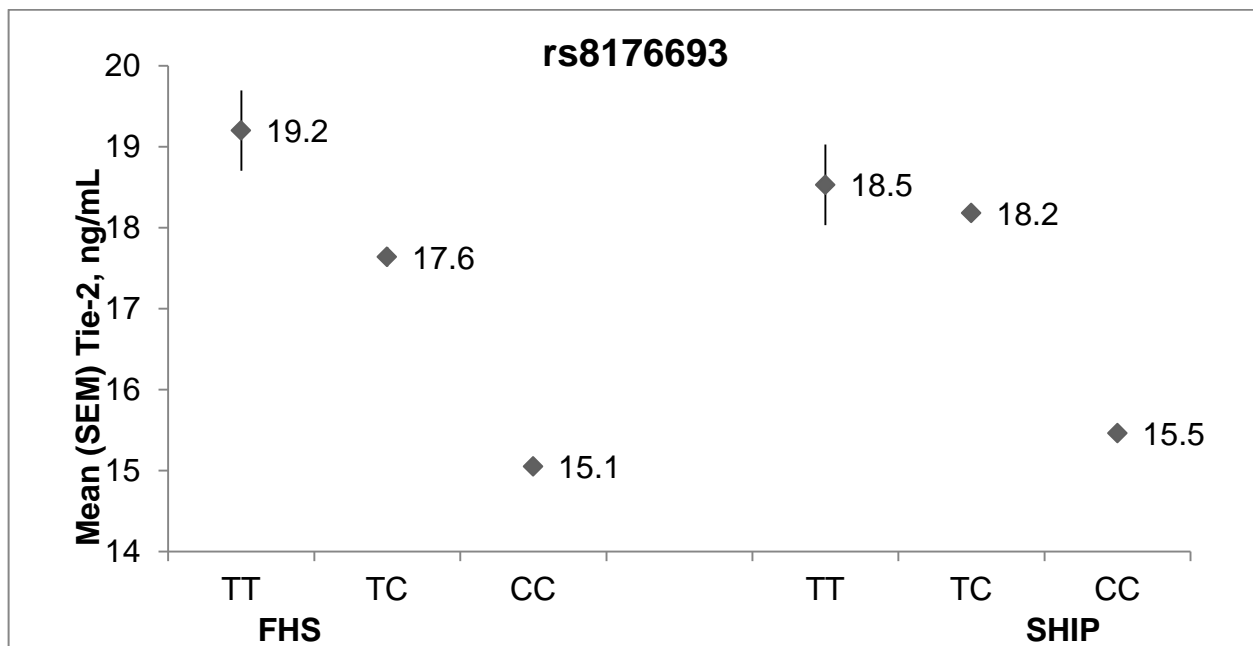

**Supplementary Table 1.** Top 5 enriched canonical pathways for hepatocyte growth factor (HGF).

| Name                                    | p-value | Ratio          |
|-----------------------------------------|---------|----------------|
| mTOR Signaling                          | 1.7E-05 | 10/198 (0.051) |
| Amyotrophic Lateral Sclerosis Signaling | 5.2E-05 | 7/103 (0.068)  |
| Regulation of eIF4 and p70S6K Signaling | 9.7E-05 | 8/164 (0.049)  |
| EIF2 Signaling                          | 4.3E-04 | 8/192 (0.042)  |
| Small Cell Lung Cancer Signaling        | 6.4E-04 | 5/85 (0.059)   |

mTOR denotes mammalian Target of Rapamycin; eIF2 (Eukaryotic Initiation Factor-2)

**Supplementary Table 2.** Frequency of the minor allele of rs5745687 in different ethnic subgroups in the 1000 Genomes data<sup>1</sup> (<http://www.1000genomes.org/data>).

| Population/ Sample                                                      | T-Allele frequency |
|-------------------------------------------------------------------------|--------------------|
| CEU (Utah Residents (CEPH) with Northern and Western European Ancestry) | 0.0647             |
| GBR (British in England and Scotland)                                   | 0.0730             |
| IBS (Iberian population in Spain)                                       | 0.1071             |
| MXL (Mexican Ancestry from Los Angeles USA)                             | 0.0547             |
| CHB (Han Chinese in Beijing, China)                                     | 0.0052             |

## References

1. Abecasis GR, Altshuler D, Auton A, Brooks LD, Durbin RM, Gibbs RA, Hurles ME, McVean GA. A map of human genome variation from population-scale sequencing. *Nature*. 2010;467:1061-1073.
